# Supplementary material for: Uniform Ni/SiO2@Au magnetic hollow microspheres: rational design and excellent catalytic performance in 4-nitrophenol reduction
Source: Royal Society of Chemistry journal article supplement (doi:10.1039/c4nr00338a), 2014-01-01
Supplement: c4nr00338a1.pdf [file c4nr00338a1.pdf]

## **Electronic Supporting Information**

### **Uniform Ni/SiO<sub>2</sub>@Au magnetic hollow microspheres: rational design and excellent catalytic performance in 4-nitrophenol reduction**

Shenghuan Zhang,<sup>a</sup> Shili Gai,<sup>a</sup> Fei He,<sup>a</sup> Yunlu Dai,<sup>b</sup> Peng Gao<sup>\*a</sup>, Lei Li,<sup>a</sup> Yujin Chen<sup>\*c</sup>, and  
Piaoping Yang<sup>\*a</sup>

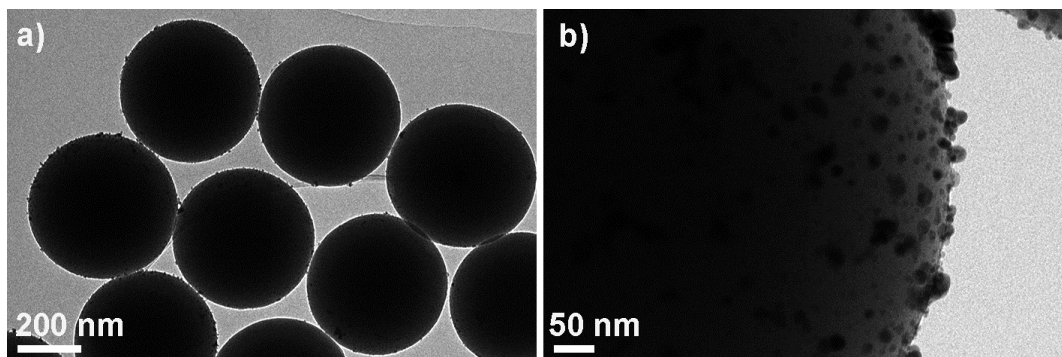

**Fig. S1** a) Low-, b) high-magnification TEM images of SiO<sub>2</sub>@Au.

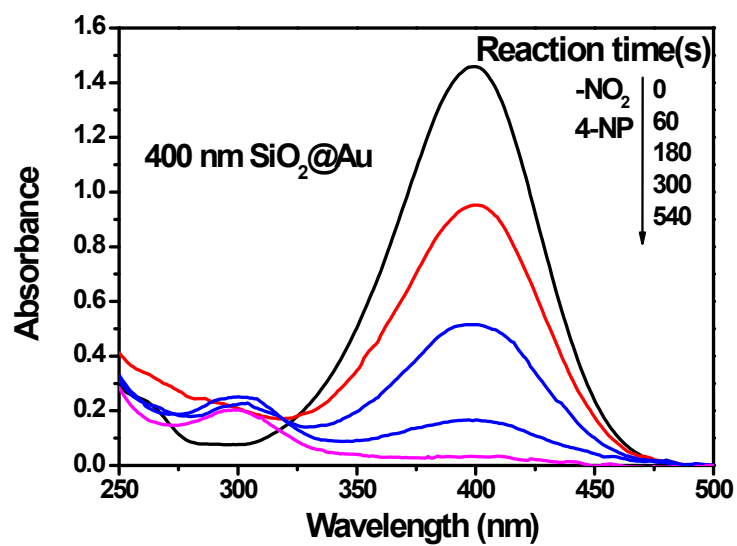

**Fig. S2** UV-vis absorption spectra of successive reduction of 4-NP using SiO<sub>2</sub>@Au as catalysts.

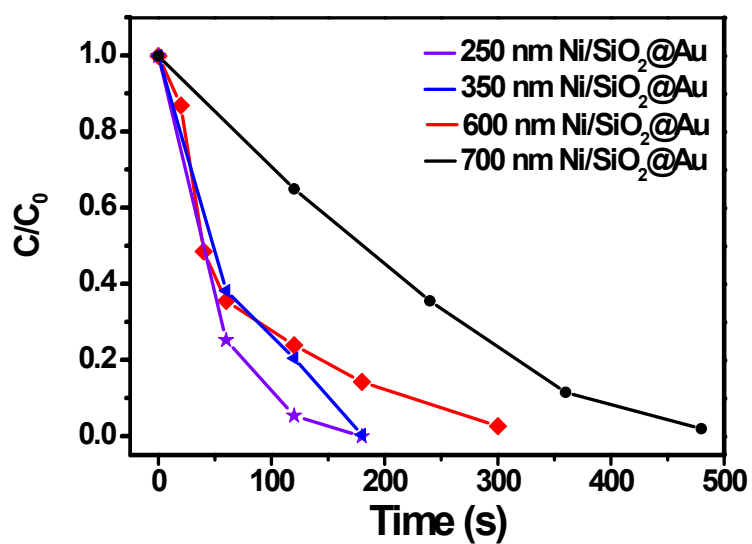

**Fig. S3**  $C/C_0$  verse reaction time for the reduction of 4-NP at the peak position of 4-NP (400 nm) using Ni/SiO<sub>2</sub>@Au with the size of 250 nm (purple line), 350 nm (blue line), 600 nm (red line) and 700 nm (black line) as catalysts

**Table 1.** The ICP data of Ni/SiO<sub>2</sub>@Au before catalytic reaction and after catalytic reaction for 8 cycles

|                             | Au (mol %) | Ni (mol%) |
|-----------------------------|------------|-----------|
| before reaction             | 1.16       | 10.37     |
| after reaction for 8 cycles | 0.79       | 7.31      |
